1    **A de novo *EDA*-variant in a litter of shorthaired standard Dachshunds with X-linked**  
2    **hypohidrotic ectodermal dysplasia**

3    Danae Vasiliadis\*, Marion Hewicker-Trautwein†, Daniela Klotz‡, Michael Fehr‡, Stefka  
4    Ruseva‡, Jennifer Arndt‡, Julia Metzger\*, Ottmar Distl\*

5    \*Institute of Animal Breeding and Genetics, University of Veterinary Medicine Hanover,  
6    Foundation, 30559 Hanover, Lower Saxony, Germany, † Institute of Pathology, University of  
7    Veterinary Medicine Hanover, Foundation, 30559 Hanover, Lower Saxony, Germany, ‡  
8    Clinic for Small Animals, University of Veterinary Medicine Hanover, Foundation, 30559  
9    Hanover, Lower Saxony, Germany

10

11 Running title: **A de novo *EDA*-variant in Dachshunds**

12

13 **KEYWORDS:** ectodermal dysplasia, canine, whole-genome sequencing, X-linked

14 inheritance, Ectodysplasin-A

15

16 Corresponding author: Ottmar Distl, Institute of Animal Breeding and Genetics, University of

17 Veterinary Medicine Hanover, Bünteweg 17p, 30559 Hannover, Germany. Phone: +49 511

18 953-8875, E-mail: [ottmar.distl@tiho-hannover.de](mailto:ottmar.distl@tiho-hannover.de)

## 19 Abstract

20 In this study, we present a detailed phenotype description and genetic elucidation of the first  
 21 case of X-linked hypohidrotic ectodermal dysplasia in the shorthaired standard Dachshund.  
 22 This condition is characterized by partial alopecia, missing and malformed teeth and a lack of  
 23 eccrine sweat glands. Clinical signs including dental X-raying and histopathological findings  
 24 were consistent with an ectodermal dysplasia. Pedigree analysis supported an X-recessive  
 25 mode of inheritance. Whole-genome sequencing of one affected puppy and his dam identified  
 26 a 1-basepair deletion within the *ectodysplasin-A* gene (CM000039.3:g.54509504delT,  
 27 PRJEB27789). Sanger sequencing of further family members confirmed the PRJEB27789-  
 28 variant. Validation in all available family members, 37 unrelated shorthaired standard  
 29 Dachshunds, 128 Dachshunds from all other breeds and samples from 34 dog breeds revealed  
 30 the PRJEB27789 variant to be private for this family. Two heterozygous females showed very  
 31 mild alopecia but normal dentition. Since the dam is demonstrably the only heterozygous  
 32 animal in the ancestry of the affected animals, we assume that the PRJEB27789-variant arose  
 33 in the germline of the granddam or in an early embryonic stage of the dam. In conclusion, we  
 34 detected a very recent de-novo *EDA* mutation causing X-linked hypohidrotic ectodermal  
 35 dysplasia in the shorthaired standard Dachshund.

36

## 37 Introduction

38 X-linked hypohidrotic ectodermal dysplasia (XLHED) is a hereditary defect that causes  
 39 malformations of structures that emerge from the ectoderm, including hair, teeth and sweat  
 40 glands (Söderholm and Kaitila 1985; Clarke 1987; Kere et al. 1996; Itin 2014). XLHED  
 41 manifests in humans with alopecia, a lack of sweat glands and possibly other exocrine glands,  
 42 oligodontia and conically shaped teeth (Clarke et al. 1987; Cluzeau et al. 2011). The affected

43 individuals therefore suffer from hypohidrosis, which can lead to hyperthermia (Mills 1968).  
 44 They are also affected with decreased mucociliary clearance, predisposing to respiratory tract  
 45 infections, decreased lacrimal function and dry eye, and problems with mastication (Beahrs et  
 46 al. 1971; Söderholm and Kaitila 1985; Clarke et al. 1987; Gilgenkrantz et al. 1989; Johnson et  
 47 al. 2002; Casal et al. 2007). In humans, XLHED is the most frequent form of ectodermal  
 48 dysplasias (Kere et al. 1996). Ectodermal dysplasias (ED) are a group of genetically  
 49 heterogeneous diseases. XLHED is caused by alterations in the *ectodysplasin-A (EDA)* gene  
 50 (Kere et al. 1996), but there are also autosomal dominant, recessive and unknown mutations  
 51 that cause an ED phenotype (Pinheiro and Freire-Maia 1994; Munoz et al. 1997; Ho et al.  
 52 1998; Monreal et al. 1999). In humans, only four genes (*EDA*, *ectodysplasin-A receptor*  
 53 (*EDAR*), *EDAR-associated death domain (EDARADD)*, and *wingless-type MMTV integration*  
 54 *site family, member 10A (WNT10A)*) are causative for 90% of hypo-/anhidrotic ED cases  
 55 (Cluzeau et al. 2011).

56 *EDA* is located on the X-chromosome. It has several transcripts and protein isoforms. In  
 57 humans, the two isoforms EDA-A1 and EDA-A2 interact with EDAR and ectodysplasin-A2  
 58 receptor (EDA2R, formerly XEDAR), respectively (Yan et al. 2000). EDAR can activate  
 59 nuclear factor kappa-B (NF- $\kappa$ B), c-Jun N-terminal kinase (JNK) and cell death pathways  
 60 (Kumar et al. 2001; Koppinen et al. 2001). The EDAR-activation of the NF- $\kappa$ B pathway is  
 61 needed for the development of skin appendages (Mikkola and Thesleff 2003; Schmidt-Ullrich  
 62 et al. 2006; Cui and Schlessinger 2006).

63 Many ED variants were identified in different species. More than 80 causal mutations are  
 64 described in humans (Huang et al. 2015). Cases in other species include mice (Srivastava et  
 65 al. 1997), cattle (Drögemüller et al. 2001), horse (Ramzan et al. 2001), fish (Kondo et al.  
 66 2001) and dogs. ED phenotypes were shown for the dog breeds Bichon Frisé (Grieshaber et  
 67 al. 1986), Labrador Retriever (Kunkle 1984), Miniature Poodle (Selmanowitz et al. 1970b),

68 Whippet (Thomsett 1961), Cocker Spaniel (Kral and Schwartzman 1964), Basset Hound  
69 (Chastain and Swayne 1985), mixed breeds of miniature Pinscher and Pekingese (Moura and  
70 Cirio 2004), German Shepherd (Casal et al. 1997) and mixed breed dogs (Waluk et al. 2016).  
71 ED phenotypes have been suspected in the breeds Belgian Shepherd, Beagle, Rottweiler,  
72 Yorkshire Terrier, French Bulldog and Lhasa Apso (Miller et al. 2013). In those latter dog  
73 breeds, the authors state that it was not always possible to determine whether the dogs  
74 exclusively had alopecia or expressed further ectodermal defects, too. The hairless dog breeds  
75 Xoloitcuintle and Chinese crested dog also exhibit an ED phenotype, as they frequently have  
76 missing teeth. The hairlessness in these breeds is caused by an autosomal dominant defect in  
77 the *FOXI3* gene (Drögemüller et al. 2008). The clinical signs of XLHED-affected dogs are  
78 almost identical to those of affected humans (Casal et al. 2007). Treatment of the disease for  
79 mice is possible using prenatal intravenous administration of recombinant EDA (Gaide and  
80 Schneider 2003). Dogs, which were treated postnatally, had improved permanent dentition  
81 and normalized lacrimation, as well as improved resistance to airway infections and sweating  
82 ability (Casal et al. 2007; Mauldin et al. 2009). Recently, human children were treated  
83 prenatally with promising results, too (Schneider et al. 2018). The objective of this study was  
84 to characterize the ED phenotype in a litter of shorthaired standard Dachshunds, to determine  
85 the most likely mode of inheritance after collection of records of relatives, and to unravel the  
86 responsible mutation. Whole-genome sequencing data were used to screen the genome for  
87 ED-associated variants and then, we validated the ED-associated variant in the close relatives  
88 of the affected Dachshunds, a large panel of different Dachshund breeds and other dog breeds.

89

## 90 **Materials and Methods**

### 91 **Ethics Statement**

92 All animal experiments were performed according to national and international guidelines for  
 93 animal welfare. All dogs in this study were privately owned and written informed consent of  
 94 their owners was obtained for this specific study. The Lower Saxony state veterinary office at  
 95 the Niedersächsisches Landesamt für Verbraucherschutz und Lebensmittelsicherheit,  
 96 Oldenburg, Germany, was the responsible Institutional Animal Care and Use Committee  
 97 (IACUC) for this study. This particular study was approved by the Niedersächsisches  
 98 Landesamt für Verbraucherschutz und Lebensmittelsicherheit (LAVES) under the file number  
 99 33.8-42502-05-18A294. Further dog samples of different breeds used as controls were taken  
 100 from the biobank of the Institute of Animal Breeding and Genetics at the University of  
 101 Veterinary Medicine Hanover.

## 102 Animals

103 Four euthanized male shorthaired standard Dachshund puppies (dogs A, B, C and D) with an  
 104 ED phenotype were presented at the Institute for Animal Breeding and Genetics of the  
 105 University of Veterinary Medicine Hanover. The owner reported that the affected puppies  
 106 developed nasal discharge and respiratory distress, which is why the puppies were euthanized  
 107 at the age of eight days. The other three puppies were female and showed no signs of a  
 108 disease. The litter was bred according to the Fédération Cynologique Internationale (FCI)  
 109 rules within the Deutscher Teckelklub 1888 e.V. (DTK). Pedigrees officially issued by the  
 110 DTK for the litter with the affected puppies, their parents, grandparents and further relatives  
 111 were provided by the dog owner.

## 112 Diagnostic imaging, necropsy and histo-pathology

113 The four affected, eight-day-old male shorthaired standard Dachshund puppies were clinically  
 114 examined. Three of the four affected puppies (dog B, C and D) were X-rayed to evaluate their  
 115 dentition. One puppy (dog A) was submitted for necropsy and histo-pathological examination.

Tissue samples were fixed in 10% neutral buffered formalin before being embedded in paraffin. For histological examination, 2–3 µm thick sections were cut and stained with hematoxylin and eosin. To compare the results with normal control tissue, formalin-fixed tissue was obtained from a 9-day-old puppy that had to be euthanized due to another reason.

## DNA and RNA sampling and extraction

We took tissue samples of the tails from the four affected puppies and EDTA-blood samples from the dam (dog E) and maternal granddam (dog F). In addition we collected EDTA-blood samples from three female full-siblings of the affected puppies (dog H, I, and J) and two full-siblings of the dam (dog K and L). DNA samples from the maternal great-granddam (dog G) and four paternal half-siblings of the dam (dogs M, N, O, P) were already in our biobank.

Genomic DNA extraction was performed using a standard salting out procedure using chloroform. Hair root samples from the dam (dog E) were taken and stored in RNAlater for RNA isolation using RNeasy Lipid Tissue Mini Kit (Qiagen, Hilden, Germany). Reverse transcription reactions from the RNA samples of the dam and a Great Dane reference animal were performed with Invitrogen Super Script IV Reverse Transcriptase (Thermo Fisher Scientific, Waltham, MA, USA).

## Whole genome sequencing (WGS)

We prepared libraries with the NEBNext Ultra II DNA Library Prep Kit for Illumina (New England BioLabs, Ipswich, MA, USA). The libraries of one affected puppy and his dam (dog A and E) were sequenced on an Illumina NextSeq500 (Illumina, San Diego, CA, USA) using the 2x150bp in paired-end mode. Quality control was applied with fastqc 0.11.5 (Andrews 2010) and reads were trimmed using PRINSEQ (V 0.20.4) (Schmieder and Edwards 2011).

We mapped the reads to the canine reference genome CanFam 3.1 (GCA\_000002285.2, Ensembl, [www.ensembl.org](http://www.ensembl.org)) using BWA 0.7.13 (Li and Durbin 2009). Sorting, indexing and

marking of duplicates was performed using SAMtools 1.3.1 (Li et al. 2009) and Picard tools (http://broadinstitute.github.io/picard/, version 2.9.4). We employed GATK version 4.0 (McKenna et al. 2010) using Base Quality Score Recalibration (BQSR), Haplotype Caller and Variant Recalibrator for variant calling. Variant effect estimation was performed on basis of SNPEff v 4.1 (Cingolani et al. 2012) for predictions on CanFam3.1.86 database. For comparison, WGS data from five dogs of the breeds Briard (n=2), German Drahthaar (n=3) and a Chinese Wolf (SRX1137188) were available. We searched the WGS data for hemizygous mutant variants on the X-chromosome and homozygous mutant variants on all autosomes using SAS, version 9.4 (Statistical Analysis System, Cary, NC, USA). Only those variants, which were predicted to have high to moderate effects using the prediction toolbox SNPEff were chosen for further analysis. Additionally we used the Ensembl Variant Effect Predictor (McLaren et al. 2010), with CanFam 3.1 as reference genome, for SIFT predictions (Kumar et al. 2009). We also applied the PolyPhen-2 (Polymorphism Phenotyping v2) tool for variant effect predictions (Adzhubei et al. 2010). The results were compared with a candidate gene list for ectodermal dysplasia (Table S1). Only variants in those genes exclusively found in dog A were considered for further analysis.

## Validation

In total, 12 shorthaired standard Dachshunds closely related with the affected puppies, further 37 unrelated shorthaired standard Dachshunds and 128 Dachshunds from other varieties (shorthaired, wirehaired and longhaired in the sizes standard, miniature and rabbit) as well as 70 dogs of 34 different breeds from our biobank were used as reference animals. A restriction fragment length polymorphism (RFLP) for mutation detection of the PRJEB27789 variant within *EDA* was developed using the restriction enzyme *AluI* (New England Biolabs) (Table S2). We designed primers for the polymerase chain reaction (PCR) using Primer3 (http://bioinfo.ut.ee/primer3/) (Untergasser et al. 2012) (Table S2). The reaction volume of 20



165  $\mu$ l was composed of 2  $\mu$ l DNA or cDNA, 11.8  $\mu$ l H<sub>2</sub>O, 4.4  $\mu$ l Q-Solution (Qiagen), 2.2  $\mu$ l  
 166 PCR-buffer (Qiagen), 0.5  $\mu$ l dNTP mix, 0.3  $\mu$ l (5 u/ $\mu$ l) Taq DNA Polymerase (Qiagen), 0.5  $\mu$ l  
 167 forward and 0.5  $\mu$ l reverse primers. The reaction was performed on a SensoQuest Labcycler  
 168 thermocycler (SensoQuest, Göttingen, Germany) setting 5 minutes denaturation at 95°C, 34  
 169 cycles of 94°C for 45 seconds, 61.3°C annealing temperature, 72°C for 45 seconds, a final  
 170 extension step at 72° for 10 minutes and then 4°C for 5 minutes. The incubation of PCR  
 171 amplicates (15  $\mu$ l) with *AluI* (0.5  $\mu$ l) was performed with 2.5  $\mu$ l H<sub>2</sub>O and 2  $\mu$ l Cutsmart  
 172 buffer (New England Biolabs) at 37°C for 12 hours. Products were separated by gel  
 173 electrophoresis using 4% agarose gels (Rotigarose, Carl Roth, Karlsruhe, Germany).  
 174 Genotypes were determined by visual examination under UV illumination (BioDocAnalyze,  
 175 Biometra, Göttingen, Germany). In addition, we used Sanger sequencing to confirm the *EDA*-  
 176 mutation (Table S2). PCR and cDNA-PCR products were treated with exonuclease I and  
 177 FastAP Thermosensitive Alkaline Phosphatase and then sequenced on an ABI 3730xl DNA  
 178 Analyzer (Eurofins GATC Biotech, Konstanz, Germany). We analyzed the Sanger sequence  
 179 data with Sequencher 4.8 software (GeneCodes, Ann Arbor, MI, USA). ORFfinder (NCBI,  
 180 <https://www.ncbi.nlm.nih.gov/orffinder/>) was used to predict the effects of the mutation on  
 181 the open reading frame. The wildtype and mutated predicted protein sequences were  
 182 compared using Clustal Omega (<https://www.ebi.ac.uk/Tools/msa/clustalo/>) (Sievers et al.  
 183 2011). The position of the protein domains of ectodysplasin were assessed with Ensembl and  
 184 Superfamily (Gough et al. 2001), Gene3D (Lewis et al. 2018), Prosite\_profiles (Sigrist et al.  
 185 2013) and Pfam (Finn et al. 2016) as domain sources .

#### 186 Data availability

187 The whole-genome sequencing data of the affected puppy and dam were deposited in the  
 188 NCBI Sequence Read Archive (<http://www.ncbi.nlm.nih.gov/sra>) under the SRA accession  
 189 number PRJNA309755 (SAMN09435548 and SAMN09435549). The *EDA*-variant is

submitted under the accession number PRJEB27789 in the European Variant Archive (EVA).

Supplemental material is available at Figshare:

EDA\_Vasiliadis\_Dachshund\_Ectodysplasin\_de\_novo.

## Results

### Clinical presentation

All four male standard shorthaired standard Dachshund puppies of the litter showed alopecia in the area of the skullcap, the median area from the base of the tail up to the last ribs, the lower chest and abdomen and the upper inner part of the limbs (Figure 1). The puppies had normal weight at birth. The parents of the affected puppies were phenotypically inconspicuous and officially, FCI-registered standard sized shorthaired Dachshund breeding dogs (Figure 2). Two of the female puppies of the litter (dogs I and J) had mild hypotrichosis of the forehead, ears and lower chest. The female puppies showed no other abnormalities and thrived well.

### Necropsy and histopathological examination

Necropsy and histo-pathological examination was done in one male puppy (dog A). Aside from the alopecia restricted to specific body areas, there were no macroscopic pathological findings. Histologically, there was a focally reduced number and lack of hair follicles in the alopecic areas of the head and back. A medium degree, focal, irregular hyperplasia of the epithelium was present in the skin of the head. There also was a medium degree, focal, subacute, purulent folliculitis as well as a low-grade inflammatory infiltration of both epidermis and dermis. The skin of the footpads missed sweat glands, and the trachea,

esophagus and bronchia were devoid of glands. There were no cilia detectable in the trachea, but in the bronchial epithelium. There was no indication of bronchopneumonia (Figure 3).

#### Diagnostic Radiology

The full-body radiological images of three affected puppies (dogs B-D) revealed no anomalies of the skeleton. Dental imaging of two of the affected puppies (dog B and D) showed multiple missing premolars and irregularly spaced teeth. However, dog C had a complete dentition and even an additional premolar (Figure 4).

#### Pedigree analysis

The pedigree of the litter with the affected puppies was traced back for six generations and phenotype data were supplemented for these dogs. The dam and sire of the affected puppies were unaffected. A litter of maternal half-siblings was inconspicuous as well as all littermates of the dam and granddam and further siblings of all progeny of ancestors. The maternal granddam (dog F) and maternal great-granddam (dog G) had healthy litters from different sires. An autosomal recessive or dominant inheritance was ruled out due to normal parents and ancestors as well as no obvious inbreeding in the six generations. The mode of inheritance suggests an, X-recessive transmission through the dam or the germline of either grandparent (Figure 2).

#### Whole genome sequencing, Sanger sequencing and mutation analysis

Whole genome sequencing of dog A revealed a 1-bp deletion in exon 6 within the *EDA* gene (CM000039.3:g.54509504delT, c.458delT). Variants in other ED candidate genes (Table S1) did not fulfill the search criteria. Poly-Phen2 predicted this mutation to be probably damaging with a score of 1.000 (sensitivity: 0.00; specificity: 1.00) using the HumDiv model. Sanger sequencing of DNA-samples of the affected puppy, dam and granddam (dogs A, E and F) confirmed dog A as hemizygous, his dam (dog E) as heterozygous and the granddam (dog F)

as wildtype (Figure 5). A cDNA Sanger sequence of dog E was hemizygous wildtype. This *EDA*-1-bp deletion was predicted to lead downstream to 21 altered amino acids (aa) and a premature stop codon in the canine *EDA* transcripts EDA-201 and EDA-202 (Figure 6). The protein sequence is predicted to lack 85 aa and thus be shortened from 258 to 173 aa (p.H153fsX173). According to the canine reference genome assembly CanFam3.1, the frameshift mutation is localized at amino acid position 153 and therefore in the tumor necrosis factor-like domain or tumor necrosis factor domain of ectodysplasin.

## Validation

PCR-RFLP revealed all four affected littermates as hemizygous mutant. The dam (dog E) was heterozygous and the maternal granddam (dog F) and maternal great-granddam (dog G) were wildtype. Female progeny of the grandsire were wildtype. The mildly hypotrichotic female siblings of the cases (dogs I and J) were heterozygous, and the female littermate with a full coat (dog H) was wildtype. A summary of all available genotypes of the family is given in Table 1. Furthermore, the *EDA*-variant was homozygous wildtype in 37 unrelated shorthaired standard Dachshunds as well as in other Dachshund breeds including shorthaired miniature (n=1), longhaired rabbit (n=6), longhaired standard (n=4), longhaired miniature (n=14), wirehaired rabbit (n=9), wirehaired standard (n=59) and wirehaired miniature (n=35) as well as in the across-breed screen for 34 different dog breeds (Table S3). We found a perfect association of the CM000039.3:g.54509504delT variant with the affected phenotype and confirmed X-linked inheritance.

## Discussion

In this study, we provide an in-depth description of an XLHED case in a litter of shorthaired standard Dachshunds. The diagnosis XLHED was based on the specific phenotype of the

puppies, their pedigree and a mutation analysis using WGS-data. The most obvious signs for XLHED were the partial alopecia with a consistent pattern among all four male cases and the tooth anomalies. This alopecia pattern is identical to those of dogs with confirmed cases of XLHED (Casal et al. 1997; Waluk et al. 2016) and also consistent with many other cases where XLHED is suspected (Moura and Cirio 2004), namely a bald forehead, abdomen and dorsal pelvic area. Secondly, the observed tooth anomalies are typical findings in XLHED (Lewis et al. 2010). Whether the remaining teeth were misshapen could not be determined on the dental X-ray of the eight-day old pups. Subsequently, the evaluation of the permanent dentition is also not applicable. The fact that one of the puppies (dog C) does not exhibit detectable tooth anomalies is not contradictory to the diagnosis of XLHED. In one case, out of 17 examined XLHED affected dogs, one had no missing teeth (Lewis et al. 2010), and in another it was stated that there were no tooth abnormalities in the two XLHED-affected, 15 month old miniature poodles (Selmanowitz et al. 1970a), suggesting some variance in the severity of affectedness. Another organ system affected in ED are exocrine glands (Cluzeau et al. 2011), which is given in our case. The examined puppy was missing eccrine sweat glands, tracheal and esophageal glands. The absent tracheal glands have led to decreased mucociliary clearance and upper respiratory tract infections, which presented as the nasal discharge and respiratory distress the male puppies were affected with. Though they did not suffer from bronchopneumonia, the signs were severe enough to prompt euthanasia of the affected male puppies.

Pedigree analysis revealed that the mode of inheritance is recessive, since the litter was born from unaffected parents. A X-chromosomal inheritance was assumed due to only male affected offspring. Thus, the most likely mode of inheritance is X-recessive with the dam as a heterozygous carrier of the mutation as confirmed through the PRJEB27789 variant. The maternal granddam was homozygous wildtype. A DNA sample could not be obtained from

the grandsire, but his normal phenotype is consistent with a X-chromosomal inheritance. We also did not identify any other offspring of granddam and -sire as carriers of the *EDA*-mutation. That source of the *EDA*-mutation may be most likely in the germline of the granddam, or in an early embryonic stage of the dam (dog E). A germline mutation in the grandsire seems less likely, as first and later offspring generations were normal and ED phenotypes were not reported from this grandsire line. In case of a germline mutation of the granddam, all somatic and germline cells of the dam harbor the mutation. We cannot exclude that the dam is a mosaic of normal and mutated cells, supporting the hypothesis of an early embryonic mutation before germ cells differentiated.

With the dam being an X-heterozygous, asymptomatic carrier one would expect that 50% of her male descendants would be affected and 50% of her female offspring carriers. The actual ratio of healthy versus affected male descendants of the dam is 1:4, which is still within statistical limits given the small sample size. Furthermore two of her six daughters (dogs I and J) were identified as carriers. The two carrier females exhibited sparse hair on the frontotemporal area, ears and ventral chest. The dentition of the dam and her carrier daughters at the age of eight weeks was inconspicuous. It is described that carrier females often suffer mild symptoms, too (Kerr et al. 1966; Söderholm and Kaitila 1985; Clarke et al. 1987; Casal et al. 1997). The variance in the severity of signs may be attributed the random inactivation of one X-chromosome in female mammals (lyonization) (Moura and Cirio 2004; Lexner et al. 2008; Vogel and Motulsky 2013). Alternatively, if the dam was a mosaic and the amount of cells carrying the mutation would be low (also called a low-level mosaicism), this would lead to the same phenotype as a skewed X-inactivation to the healthy side. Low-level mosaicism in the dog is a rare condition, but may be underdiagnosed (Switonski et al. 2003).

For the mutation detection in the WGS data, the filtering criteria left only *EDA* as a candidate gene. This was expected, since the other most common ED candidate genes do not match our

observed phenotype and mode of inheritance. *EDAR* and *EDARADD* mutations would cause a clinically indistinguishable phenotype, but are inherited as autosomal, and *WNT10A* also causes a distinct phenotype with nail dystrophy (Cluzeau et al. 2011). Mutations in further ED candidate genes *TNF receptor associated factor 6 (TRAF6)*, *Inhibitor Of Nuclear Factor Kappa B Kinase Subunit Gamma (IKBKG, formerly NEMO)*, *NFκB inhibitor α (NFKBIA)* and *NFκBs* also cause immunodeficiency (Cui and Schlessinger 2006) and variants with effects on protein function were not identified in these candidates. Subsequently the CM000039.3:g.54509504delT variant was the only one that met all conditions and was validated.

The mutation c.458delT causes a frameshift, leading to altered aa and a premature stop codon and thus shortening of all canine ectodysplasin-A isoforms. The mutation was predicted to affect the tumor-necrosis-factor domain of the protein, thus probably rendering this domain useless (Schneider et al. 2001). Depiction of the mutated mRNA by Sanger sequencing a cDNA-PCR product of the heterozygous dog E was attempted, but apparently, only the mRNA from the intact chromosome was sequenced, so the Sanger sequence came out as (hemizygous) wildtype. We therefore speculate that in case of a mosaicism, it is possible that the hair collection site (the tail) consisted only of normal cells. Another possibility is that the mutant mRNA is produced, but quickly detected as faulty by the organism and therefore degraded. It is possible that the small fragments of the degraded mRNA showed up as mild interference in the chromatogram of the Sanger sequence. The degradation of mRNA with premature stop codons is a well-known phenomenon, called nonsense-mediated decay (Wagner and Lykke-Andersen 2002). The degradation can be initiated by the removal of the mRNA poly-A tail, which provides access for degradative enzymes to the body of the mRNA (Wilusz et al. 2001). If the dam's X-inactivation was skewed to the healthy side, so that more of the mutant than of the healthy chromosome was inactivated, this would leave a large

enough amount of functional ectodysplasin for her to not develop ED signs. Alternatively, if the mutant *EDA* was transcribed, the protein would be nonfunctional because of the damaged TNF-domain.

The TNF-domain is crucial to the function of ectodysplasin-A (Schneider et al. 2001). The TNF-domain of this type II membrane protein is located extracellular (Ezer et al. 1999). From there the TNF-domain is cleaved to produce a soluble ligand that forms trimers and interacts with its respective receptors (Elomaa et al. 2001; Chen et al. 2001). One isoform of ectodysplasin-A, EDA-A2, is specific to the receptor EDA2R (Yan et al. 2000). This pathway can activate NF- $\kappa$ B in vitro (Yan et al. 2000; Sinha et al. 2002), but not in-vivo (Gaide and Schneider 2003; Mustonen et al. 2003). Furthermore, the role of EDA2R signaling seems expendable in skin development, as *EDA2R* knockout mice do not show an ED phenotype (Newton et al. 2004). EDA-A1, however, is well known for binding to its receptor EDAR (Yan et al. 2000). EDAR in turn binds to its cytoplasmic signaling adaptor EDARADD (Headon et al. 2001), which via TRAF6 activates the I $\kappa$ B kinase (IKK) complex (Morlon et al. 2005). From there on, apparently the IKBKG/I $\kappa$ B $\alpha$ -dependent NF- $\kappa$ B cascade is initiated (Cui and Schlessinger 2006; Weih and Caamaño 2003). The NF- $\kappa$ B pathway is crucial for the development of skin appendages. Thus it is plausible, that a mutation in the TNF domain of ectodysplasin-A, leads to impaired binding of both isoforms to their receptors (Schneider et al. 2001), subsequently leading to a disrupted EDA/NF- $\kappa$ B signaling pathway and manifesting itself in XLHED. In conclusion, this study demonstrates the first XLHED cases in the shorthaired standard Dachshund, most likely due to an *EDA* germline mutation in the dam or maternal granddam. The PRJEB27789 variant is predicted to cause a nonfunctional protein due to a damage of the TNF-domain needed for the *EDA* signaling pathway. Variance in affectedness of carrier females was obvious and possibly attributable to a skewed X-inactivation, or, in case of the dam, to low-level mosaicism.



360

## 361 **Acknowledgements**

362 The authors would like to thank the owners of the dogs included in the study for donating  
 363 samples and sharing information about their dogs, particularly the Dachshund breeder for  
 364 reporting the case and providing us with pedigree data. Special thanks go to J. Wrede, M.  
 365 Drabert, H. Klippert-Hasberg and N. Wagner for their expert technical assistance. We  
 366 gratefully acknowledge support from the North-German Supercomputing Alliance (HLRN,  
 367 Hanover) for HPC-resources that contributed to the research results.

368

## 369 **Literature cited**

370 Adzhubei, I.A., S. Schmidt, L. Peshkin, V.E. Ramensky, A. Gerasimova *et al.*, 2010 A  
 371 method and server for predicting damaging missense mutations. *Nat. Methods* **7** (4):  
 372 248-249.

373 Andrews, S., 2010 FastQC: A quality control tool for high throughput sequence data.  
 374 Reference source, <http://www.bioinformatics.babraham.ac.uk/projects/fastqc/>.

375 Beahrs, J.O., G.A. Lillington, R.C. Rosan, L. Russin, J.A. Lindgren *et al.*, 1971 Anhidrotic  
 376 ectodermal dysplasia: predisposition to bronchial disease. *Ann. Intern. Med.* **74** (1):  
 377 92-96.

378 Casal, M., P. Jezyk, J. Greek, M. Goldschmidt, and D. Patterson, 1997 X-linked ectodermal  
 379 dysplasia in the dog. *J. Hered.* **88** (6): 513-517.

380 Casal, M.L., J.R. Lewis, E.A. Mauldin, A. Tardivel, K. Ingold *et al.*, 2007 Significant  
 381 correction of disease after postnatal administration of recombinant ectodysplasin A in  
 382 canine X-linked ectodermal dysplasia. *Am. J. Hum. Genet.* **81** (5): 1050-1056.

383 Chastain, C., and D. Swayne, 1985 Congenital hypotrichosis in male basset hound littermates.  
384 *J. Am. Vet. Med. Assoc.* **187** (8): 845-846.

385 Chen, Y., S.S. Molloy, L. Thomas, J. Gambee, H.P. Bächinger *et al.*, 2001 Mutations within a  
386 furin consensus sequence block proteolytic release of ectodysplasin-A and cause X-  
387 linked hypohidrotic ectodermal dysplasia. *Proc. Natl. Acad. Sci. USA.* **98** (13): 7218-  
388 7223.

389 Cingolani, P., A. Platts, L.L. Wang, M. Coon, T. Nguyen *et al.*, 2012 A program for  
390 annotating and predicting the effects of single nucleotide polymorphisms, SnpEff:  
391 SNPs in the genome of *Drosophila melanogaster* strain w<sup>1118</sup>; iso-2; iso-3. *Fly* **6** (2):  
392 80-92.

393 Clarke, A., 1987 Hypohidrotic ectodermal dysplasia. *J. Med. Genet.* **24** (11): 659.

394 Clarke, A., D. Phillips, R. Brown, and P. Harper, 1987 Clinical aspects of X-linked  
395 hypohidrotic ectodermal dysplasia. *Arch. Dis. Child.* **62** (10): 989-996.

396 Cluzeau, C., S. Hadj-Rabia, M. Jambou, S. Mansour, P. Guigue *et al.*, 2011 Only four genes  
397 (EDA1, EDAR, EDARADD, and WNT10A) account for 90% of  
398 hypohidrotic/anhidrotic ectodermal dysplasia cases. *Hum. Mutat.* **32** (1): 70-72.

399 Cui, C.-Y., and D. Schlessinger, 2006 EDA signaling and skin appendage development. *Cell*  
400 *cycle* **5** (21): 2477-2483.

401 Drögemüller, C., O. Distl, and T. Leeb, 2001 Partial deletion of the bovine ED1 gene causes  
402 anhidrotic ectodermal dysplasia in cattle. *Genome Res.* **11** (10): 1699-1705.

403 Drögemüller, C., E.K. Karlsson, M.K. Hytönen, M. Perloski, G. Dolf *et al.*, 2008 A mutation  
404 in hairless dogs implicates FOXI3 in ectodermal development. *Science* **321** (5895):  
405 1462-1462.

406 Elomaa, O., K. Pulkkinen, U. Hannelius, M. Mikkola, U. Saarialho-Kere *et al.*, 2001  
407 Ectodysplasin is released by proteolytic shedding and binds to the EDAR protein.  
408 *Hum. Mol. Genet.* **10** (9): 953-962.

409 Ezer, S., M. Bayés, D. Schlessinger, and J. Kere, 1999 Ectodysplasin is a collagenous trimeric  
410 type II membrane protein with a tumor necrosis factor-like domain and co-localizes  
411 with cytoskeletal structures at lateral and apical surfaces of cells. *Hum. Mol. Genet.* **8**  
412 (11): 2079-2086.

413 Finn, R.D., P. Coghill, R.Y. Eberhardt, S.R. Eddy, J. Mistry *et al.*, 2016 The Pfam protein  
414 families database: towards a more sustainable future. *Nucleic Acids Res.* **44** (D1):  
415 D279-D285.

416 Gaide, O., and P. Schneider, 2003 Permanent correction of an inherited ectodermal dysplasia  
417 with recombinant EDA. *Nat. Med.* **9** (5): 614.

418 Gilgenkrantz, S., C. Blanchet-Bardon, V. Nazzaro, L. Formiga, P. Mujica *et al.*, 1989  
419 Hypohidrotic ectodermal dysplasia. *Hum. Genet.* **81** (2): 120-122.

420 Gough, J., K. Karplus, R. Hughey, and C. Chothia, 2001 Assignment of homology to genome  
421 sequences using a library of hidden Markov models that represent all proteins of  
422 known structure. *J. Mol. Biol.* **313** (4): 903-919.

423 Grieshaber, T., J. Blakemore, and S. Yaskulski, 1986 Congenital alopecia in a Bichon Frise. *J.*  
424 *Am. Vet. Med. Assoc.* **188** (9): 1053-1054.

425 Headon, D.J., S.A. Emmal, B.M. Ferguson, A.S. Tucker, M.J. Justice *et al.*, 2001 Gene defect  
426 in ectodermal dysplasia implicates a death domain adapter in development. *Nature*  
427 **414** (6866): 913.

428 Ho, L., M.S. Williams, and R.A. Spritz, 1998 A gene for autosomal dominant hypohidrotic  
429 ectodermal dysplasia (EDA3) maps to chromosome 2q11-q13. *Am. J. Hum. Genet.* **62**  
430 (5): 1102-1106.

431 Huang, S., J. Liang, W. Sui, H. Lin, W. Xue *et al.*, 2015 EDA mutation as a cause of  
432 hypohidrotic ectodermal dysplasia: a case report and review of the literature. *Genet.*  
433 *Mol. Res.* **14**: 10344-10351.

434 Itin, P.H., 2014 Etiology and pathogenesis of ectodermal dysplasias. *Am. J. Med. Genet. A*  
435 **164** (10): 2472-2477.

436 Johnson, E.L., M.W. Roberts, A.D. Guckes, L.T.J. Bailey, C.L. Phillips *et al.*, 2002 Analysis  
437 of craniofacial development in children with hypohidrotic ectodermal dysplasia. *Am.*  
438 *J. Med. Genet. A* **112** (4): 327-334.

439 Kere, J., A.K. Srivastava, O. Montonen, J. Zonana, N. Thomas *et al.*, 1996 X-linked  
440 anhidrotic (hypohidrotic) ectodermal dysplasia is caused by mutation in a novel  
441 transmembrane protein. *Nat. Genet.* **13** (4): 409.

442 Kerr, C., R. Wells, and K. Cooper, 1966 Gene effect in carriers of anhidrotic ectodermal  
443 dysplasia. *J. Med. Genet.* **3** (3): 169.

444 Kondo, S., Y. Kuwahara, M. Kondo, K. Naruse, H. Mitani *et al.*, 2001 The medaka rs-3 locus  
445 required for scale development encodes ectodysplasin-A receptor. *Curr. Biol.* **11** (15):  
446 1202-1206.

447 Koppinen, P., J. Pispä, J. Laurikkala, I. Thesleff, and M. Mikkola, 2001 Signaling and  
448 subcellular localization of the TNF receptor Edar. *Exp. Cell Res.* **269** (2): 180-192.

449 Kral, F., and R.M. Schwartzman, 1964 Veterinary and Comparative Dermatology. *Acad. Med.*  
450 **39** (9): 870.

451 Kumar, A., M.T. Eby, S. Sinha, A. Jasmin, and P.M. Chaudhary, 2001 The ectodermal  
452 dysplasia receptor activates the nuclear factor- $\kappa$ B, JNK, and cell death pathways and  
453 binds to ectodysplasin A. *J. Biol. Chem.* **276** (4): 2668-2677.

454 Kumar, P., S. Henikoff, and P.C. Ng, 2009 Predicting the effects of coding non-synonymous  
455 variants on protein function using the SIFT algorithm. *Nat. Protoc.* **4** (7): 1073.

456 Kunkle, G., 1984 Congenital hypotrichosis in two dogs. *J. Am. Vet. Med. Assoc.* **185** (1): 84.

457 Lewis, J., A. Reiter, E. Mauldin, and M. Casal, 2010 Dental abnormalities associated with  
458 X-linked hypohidrotic ectodermal dysplasia in dogs. *Orthod. Craniofac. Res.* **13** (1):  
459 40-47.

460 Lewis, T.E., I. Sillitoe, N. Dawson, S.D. Lam, T. Clarke *et al.*, 2018 Gene3D: Extensive  
461 prediction of globular domains in proteins. *Nucleic Acids Res.* **46** (D1): D435-D439.

462 Lexner, M., A. Bardow, I. Juncker, L. Jensen, L. Almer *et al.*, 2008 X-linked hypohidrotic  
463 ectodermal dysplasia. Genetic and dental findings in 67 Danish patients from 19  
464 families. *Clin. Genet.* **74** (3): 252-259.

465 Li, H., and R. Durbin, 2009 Fast and accurate short read alignment with Burrows–Wheeler  
466 transform. *Bioinformatics* **25** (14): 1754-1760.

467 Li, H., B. Handsaker, A. Wysoker, T. Fennell, J. Ruan *et al.*, 2009 The sequence  
468 alignment/map format and SAMtools. *Bioinformatics* **25** (16): 2078-2079.

469 Mauldin, E.A., O. Gaide, P. Schneider, and M.L. Casal, 2009 Neonatal treatment with  
470 recombinant ectodysplasin prevents respiratory disease in dogs with X-linked  
471 ectodermal dysplasia. *Am. J. Med. Genet. A* **149** (9): 2045-2049.

472 McKenna, A., M. Hanna, E. Banks, A. Sivachenko, K. Cibulskis *et al.*, 2010 The Genome  
473 Analysis Toolkit: a MapReduce framework for analyzing next-generation DNA  
474 sequencing data. *Genome Res.* **20** (9): 1297-1303.

475 McLaren, W., B. Pritchard, D. Rios, Y. Chen, P. Flicek *et al.*, 2010 Deriving the  
476 consequences of genomic variants with the Ensembl API and SNP Effect Predictor.  
477 *Bioinformatics* **26** (16): 2069-2070.

478 Mikkola, M.L., and I. Thesleff, 2003 Ectodysplasin signaling in development. *Cytokine*  
479 *Growth Factor Rev.* **14** (3-4): 211-224.

480 Miller, W.H., C.E. Griffin, K.L. Campbell, and G.H. Muller, 2013 *Muller and Kirk's Small*  
481 *Animal Dermatology7: Muller and Kirk's Small Animal Dermatology*: Elsevier Health  
482 Sciences.

483 Mills, J., 1968 Anhidrotic ectodermal dysplasia presenting as a pyrexia of undertermined  
484 origin in the neonatal period. *Postgrad. Med. J.* **44** (508): 193.

485 Monreal, A.W., B.M. Ferguson, D.J. Headon, S.L. Street, P.A. Overbeek *et al.*, 1999  
486 Mutations in the human homologue of mouse dl cause autosomal recessive and  
487 dominant hypohidrotic ectodermal dysplasia. *Nat. Genet.* **22** (4): 366.

488 Morlon, A., A. Munnich, and A. Smahi, 2005 TAB2, TRAF6 and TAK1 are involved in NF- $\kappa$   
489 B activation induced by the TNF-receptor, Edar and its adaptator Edaradd. *Hum. Mol.*  
490 *Genet.* **14** (23): 3751-3757.

491 Moura, E., and S.M. Cirio, 2004 Clinical and genetic aspects of X-linked ectodermal  
492 dysplasia in the dog—a review including three new spontaneous cases. *Vet. Dermatol.*  
493 **15** (5): 269-277.

494 Munoz, R., G. Lestringant, V. Sybert, M. Frydman, A. Alswaini *et al.*, 1997 Definitive  
495 Evidence for an Autosomal Recessive Form of Hypohidrotic Ectodermal Dysplasia  
496 Clinically Indistinguishable from the More Common X-Linked Disorder. *Am. J. Hum.*  
497 *Genet.* **61** (1): 94-100.

498 Mustonen, T., J. Pispa, M.L. Mikkola, M. Pummila, A.T. Kangas *et al.*, 2003 Stimulation of  
499 ectodermal organ development by Ectodysplasin-A1. *Dev. Biol.* **259** (1): 123-136.

500 Newton, K., D.M. French, M. Yan, G.D. Frantz, and V.M. Dixit, 2004 Myodegeneration in  
501 EDA-A2 transgenic mice is prevented by XEDAR deficiency. *Mol. Cell. Biol.* **24** (4):  
502 1608-1613.

503 Pinheiro, M., and N. Freire-Maia, 1994 Ectodermal dysplasias: a clinical classification and a  
504 causal review. *Am. J. Med. Genet. A* **53** (2): 153-162.

505 Ramzan, P., P. Dixon, S. Kempson, and P. Rosedale, 2001 Dental dysplasia and oligodontia  
506 in a thoroughbred colt. *Equine Vet. J.* **33** (1):99-104.

507 Schmidt-Ullrich, R., D.J. Tobin, D. Lenhard, P. Schneider, R. Paus *et al.*, 2006 NF- $\kappa$ B  
508 transmits Eda A1/EdaR signalling to activate Shh and cyclin D1 expression, and  
509 controls post-initiation hair placode down growth. *Development* **133** (6): 1045-1057.

510 Schmieder, R., and R. Edwards, 2011 Quality control and preprocessing of metagenomic  
511 datasets. *Bioinformatics* **27** (6): 863-864.

512 Schneider, H., F. Faschingbauer, S. Schuepbach-Mallepell, I. Körber, S. Wohlfart *et al.*, 2018  
513 Prenatal Correction of X-Linked Hypohidrotic Ectodermal Dysplasia. *N. Engl. J. Med.*  
514 **378** (17): 1604-1610.

515 Schneider, P., S.L. Street, O. Gaide, S. Hertig, A. Tardivel *et al.*, 2001 Mutations leading to  
516 X-linked hypohidrotic ectodermal dysplasia affect three major functional domains in  
517 the tumor necrosis factor family member ectodysplasin-A. *J. Biol. Chem.* **276** (22):  
518 18819-18827.

519 Selmanowitz, V.J., K.M. Kramer, and N. Orentreich, 1970a Congenital ectodermal defect in  
520 Miniature Poodles. *J. Hered.* **61**: 196-199.

521 Selmanowitz, V.J., K.M. Kramer, N. Orentreich, and A.B. Hyman, 1970b Congenital  
522 ectodermal dysplasia in male miniature poodle siblings. *Arch. Dermatol.* **101** (5): 613-  
523 615.

524 Sievers, F., A. Wilm, D. Dineen, T.J. Gibson, K. Karplus *et al.*, 2011 Fast, scalable generation  
525 of high-quality protein multiple sequence alignments using Clustal Omega. *Mol. Syst.*  
526 *Biol.* **7** (1): 539.

527 Sigrist, C.J., E. de Castro, L. Cerutti, B.A. Cuche, N. Hulo *et al.*, 2013 New and continuing  
528 developments at PROSITE. *Nucleic Acids Res.* **41** (Database issue): D344-347.

529 Sinha, S.K., S. Zachariah, H.I. Quiñones, M. Shindo, and P.M. Chaudhary, 2002 Role of  
530 TRAF3 and-6 in the activation of the NF-κB and JNK pathways by X-linked  
531 Ectodermal Dysplasia Receptor. *J. Biol. Chem.* **277** (47): 44953-44961.

532 Söderholm, A.L., and I. Kaitila, 1985 Expression of X-linked hypohidrotic ectodermal  
533 dysplasia in six males and in their mothers. *Clin. Genet.* **28** (2): 136-144.

534 Srivastava, A.K., J. Pispa, A.J. Hartung, Y.Z. Du, S. Ezer *et al.*, 1997 The Tabby phenotype is  
535 caused by mutation in a mouse homologue of the EDA gene that reveals novel mouse

and human exons and encodes a protein (ectodysplasin-A) with collagenous domains.  
*Proc. Natl. Acad. Sci. USA.* **94** (24): 13069-13074.

Switonski, M., I. Szczerbal, J. Grewling, P. Antosik, W. Nizanski *et al.*, 2003 Two Cases of  
 Infertile Bitches With 78,XX/77,X Mosaic Karyotype: A Need for Cytogenetic  
 Evaluation of Dogs With Reproductive Disorders. *J. Hered.* **94** (1): 65-68.

Thomsett, L., 1961 Congenital hypotrichia in the dog. *Vet. Rec.* **73**: 915-917.

Untergasser, A., I. Cutcutache, T. Koressaar, J. Ye, B.C. Faircloth *et al.*, 2012 Primer3—new  
 capabilities and interfaces. *Nucleic Acids Res.* **40** (15): e115-e115.

Vogel, F., and A.G. Motulsky, 2013 *Vogel and Motulsky's Human Genetics: Problems and  
 Approaches*: Springer Science & Business Media.

Wagner, E., and J. Lykke-Andersen, 2002 mRNA surveillance: the perfect persist. *J. Cell Sci.*  
**115** (15): 3033-3038.

Waluk, D.P., G. Zur, R. Kaufmann, M.M. Welle, V. Jagannathan *et al.*, 2016 A splice defect  
 in the EDA gene in dogs with an X-linked hypohidrotic ectodermal dysplasia  
 (XLHED) phenotype. *G3 (Bethesda)* **6** (9): 2949-2954.

Weih, F., and J. Caamaño, 2003 Regulation of secondary lymphoid organ development by the  
 nuclear factor- $\kappa$ B signal transduction pathway. *Immunol. Rev.* **195** (1): 91-105.

Wilusz, C.J., M. Wormington, and S.W. Peltz, 2001 The cap-to-tail guide to mRNA turnover.  
*Nat. Rev. Mol. Cell Biol.* **2**: 237.

Yan, M., L.-C. Wang, S.G. Hymowitz, S. Schilbach, J. Lee *et al.*, 2000 Two-amino acid  
 molecular switch in an epithelial morphogen that regulates binding to two distinct  
 receptors. *Science* **290** (5491): 523-527.

## Figures and Tables



**Figure 1** Phenotypic appearance of a male affected shorthaired standard Dachshund (dog A). The characteristic alopecia pattern is easily recognizable. (A) The forehead and the chest with the well demarked hypotrichosis. (B) The whole underbelly is hairless, too. Note that the nails and footpads are developed normally. (C) The alopecia also extends in a dorsal stripe from the base of the tail up to the last ribs. The three other affected male puppies shared the exact phenotype. Three of the puppies were black and tan and one was brown.

**Figure 2** Pedigree of the affected shorthaired standard Dachshund family. Family members, which are mentioned in this study, are marked with the letters A to P. Also given are the genotypes for every dog we were able to get DNA samples from. A square symbol means a male individual, and a circle a female. Filled out symbols mark the XLHED-affected individuals.

**Figure 3** Histopathology of the eight days old Dachshund puppy (right panels) compared to a 9-days-old control puppy (left panels). In normal skin, numerous hair follicles are visible (A), while in alopecic areas the hair follicle number is highly reduced with a segmental absence (B). Numerous eccrine sweat glands in the fat pad can be detected in the control footpad (C), whereas in the examined Dachshund puppy no glandular structures are recognizable (D). Individual bronchial glands can often be observed next to cartilage structures (E), whereas in the examined Dachshund puppy no glandular structures were detected in the bronchi (F). In the submucosa of the trachea (G) and esophagus (I), numerous nests of glands are usually recognizable, while they are completely absent in the examined Dachshund puppy (H, J). (Hematoxylin and eosin stains; Bar in A, B, C, D: 200µm; Bar in E and F: 50 µm; Bar in G, H, I, J: 100 µm).

**Figure 4** Dental imaging for dogs B, C and D. Depicted are the mandibular (right) and maxillar (left) X-rays of three of the affected male puppies. A healthy puppy should have the following developing teeth in the upper and lower jaw at the age of eight days: six incisors,

two canines, four premolars and two molars. In the upper jaw of dog B (A1), two premolars are missing, the lower jaw (A2) has a full bite but with irregularly spaced teeth. Dog C has a full bite in both jaws and additional premolar in the lower jaw (B2). Dog D has two missing premolars in the upper jaw (C1) and three missing premolars in the lower jaw (C2).

**Figure 5** Sanger sequencing chromatograms of dogs A, E and F. The granddam (dog F) was homozygous wildtype. At position *EDA*:c.458 the wildtype allele T is present. One of the affected male puppies shows at position *EDA*:c.458 deletion of the allele T (dog A). His dam (dog E) is heterozygous resulting in a shift of the sequence with the PRJEB27789 variant.

**Figure 6** Given are the known ectodysplasin-A-protein isoforms of the canine *EDA* gene and the predicted effect of the *EDA*:c.458delT frameshift mutation on their proteins. First, we compared the various wildtype protein sequences as stated by the databases Ensembl and NCBI (A). Then we present the respective predicted mutant protein sequences (B). The frameshift mutation was predicted to lead to 21 altered amino acids and a premature stop codon in the *EDA* transcripts *EDA*-201 and *EDA*-202 (Ensembl). The produced proteins therefore would lack 85 amino acids. The database NCBI (<https://www.ncbi.nlm.nih.gov/>) lists another five ectodysplasin-A isoforms, which would also be shortened by 85 to 30 amino acids. The stated protein sequences of both databases differ. *EDA*-201 and *EDA*-202 have the same length of 258 amino acids, but differ on 10 amino acids. Ectodysplasin-A as stated by NCBI has a sequence identical to *EDA*-201 but is 128 amino acids longer, as the predicted transcription starts earlier. The other isoforms of ectodysplasin-A are one to five amino acids shorter and with a few non-matching amino acids. According to the canine reference genome assembly CanFam3.1, the frameshift mutation is localized at amino acid position 153 (281 resp. 278 for the NCBI-isoforms) and therefore in the tumor necrosis factor-like domain or tumor necrosis factor domain of ectodysplasin. In each case, the mutation leads to an altered

and shortened protein sequence, thus rendering the tumor-necrosis-factor-domain of the ectodysplasin-A isoforms useless.

**Table 1** Genotyping results for the CM000039.3:g.54509504delT variant of the affected Dachshund family and reference dogs. The Dachshund breed, the number of individuals per breed, and the respective sex and genotype are stated. For the affected dachshund family, the predicted genotype is also stated, when it could be deducted from phenotype and/or mode of inheritance.

## Supplementary Files

**Table S1** Candidate gene list analysis. Genes potentially involved in ectodermal dysplasia were identified using NCBI Gene database. The canine chromosome position, genes, gene ID and name are shown.

**Table S2** Primer sequences used for validation of the mutation detected by whole genome and Sanger sequencing. The variant CM000039.3:g.54509504delT, c.458delT was validated by the use of restriction fragment length polymorphism (RFLP). Primer pairs, amplicon size (AS) in base pairs (bp), annealing temperature (AT), restriction enzyme and incubation temperature (IT) are given. Also depicted are the three primers used for cDNA Sanger sequencing.

**Table S3** Genotyping results for the CM000039.3:g.54509504delT variant of reference dogs of other breeds. The dog breed, the number of individuals per breed, and the respective sex and genotype are stated. 70 dogs of 34 breeds were tested in total.

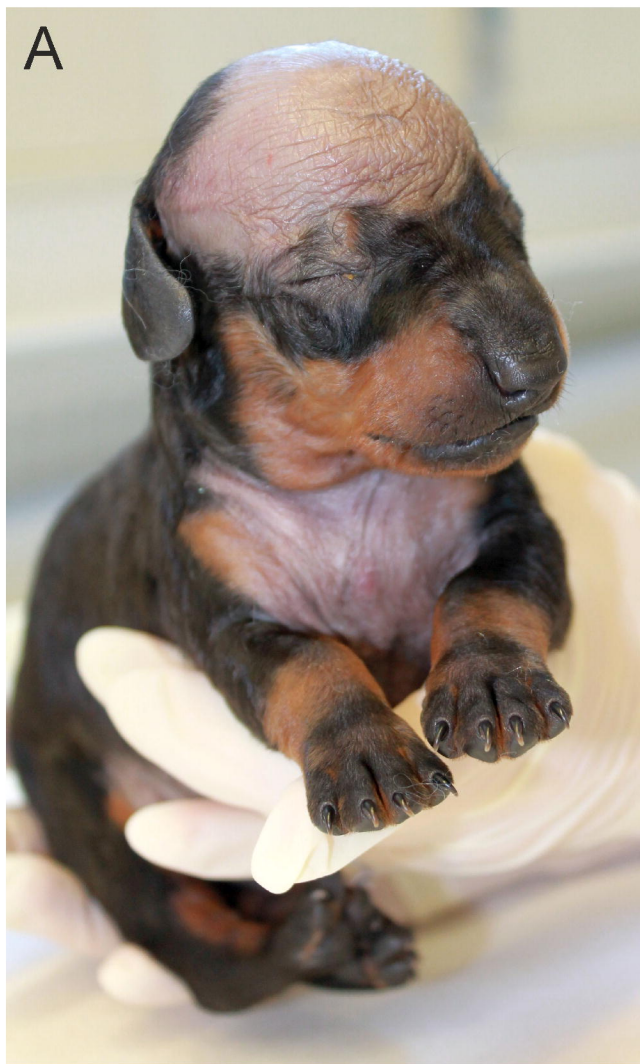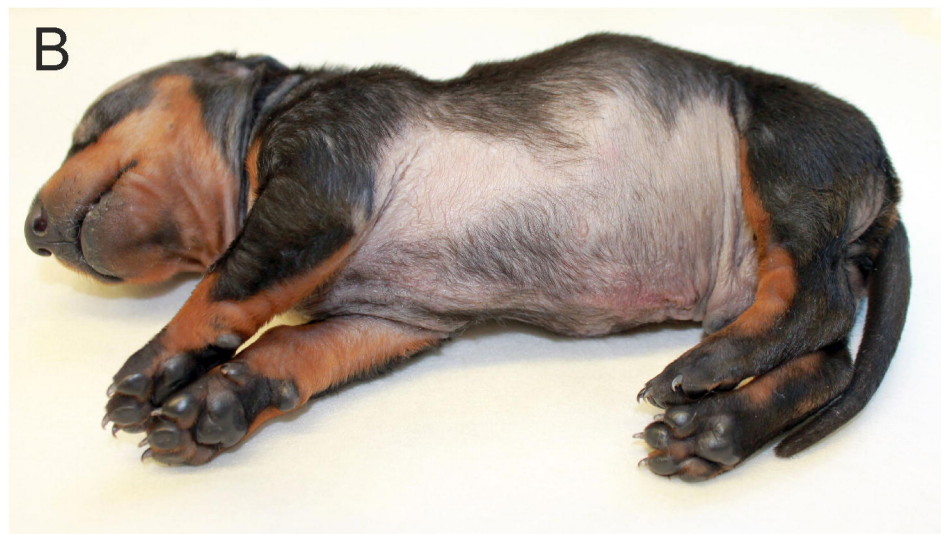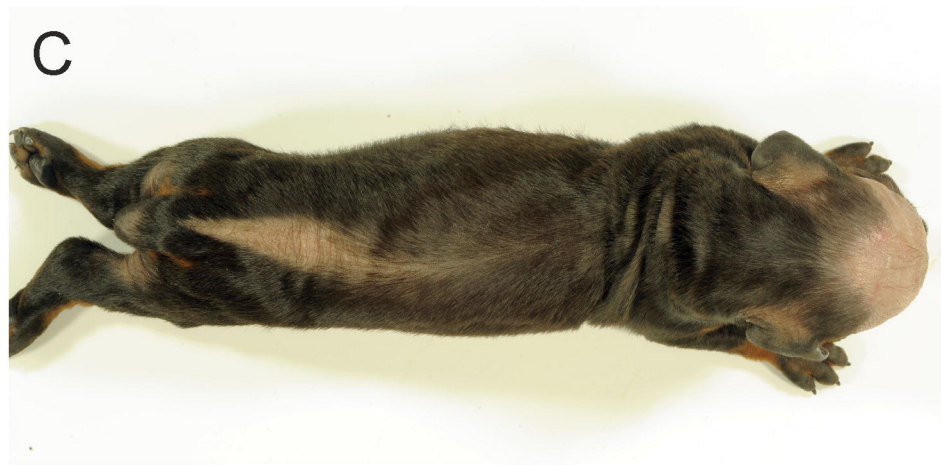

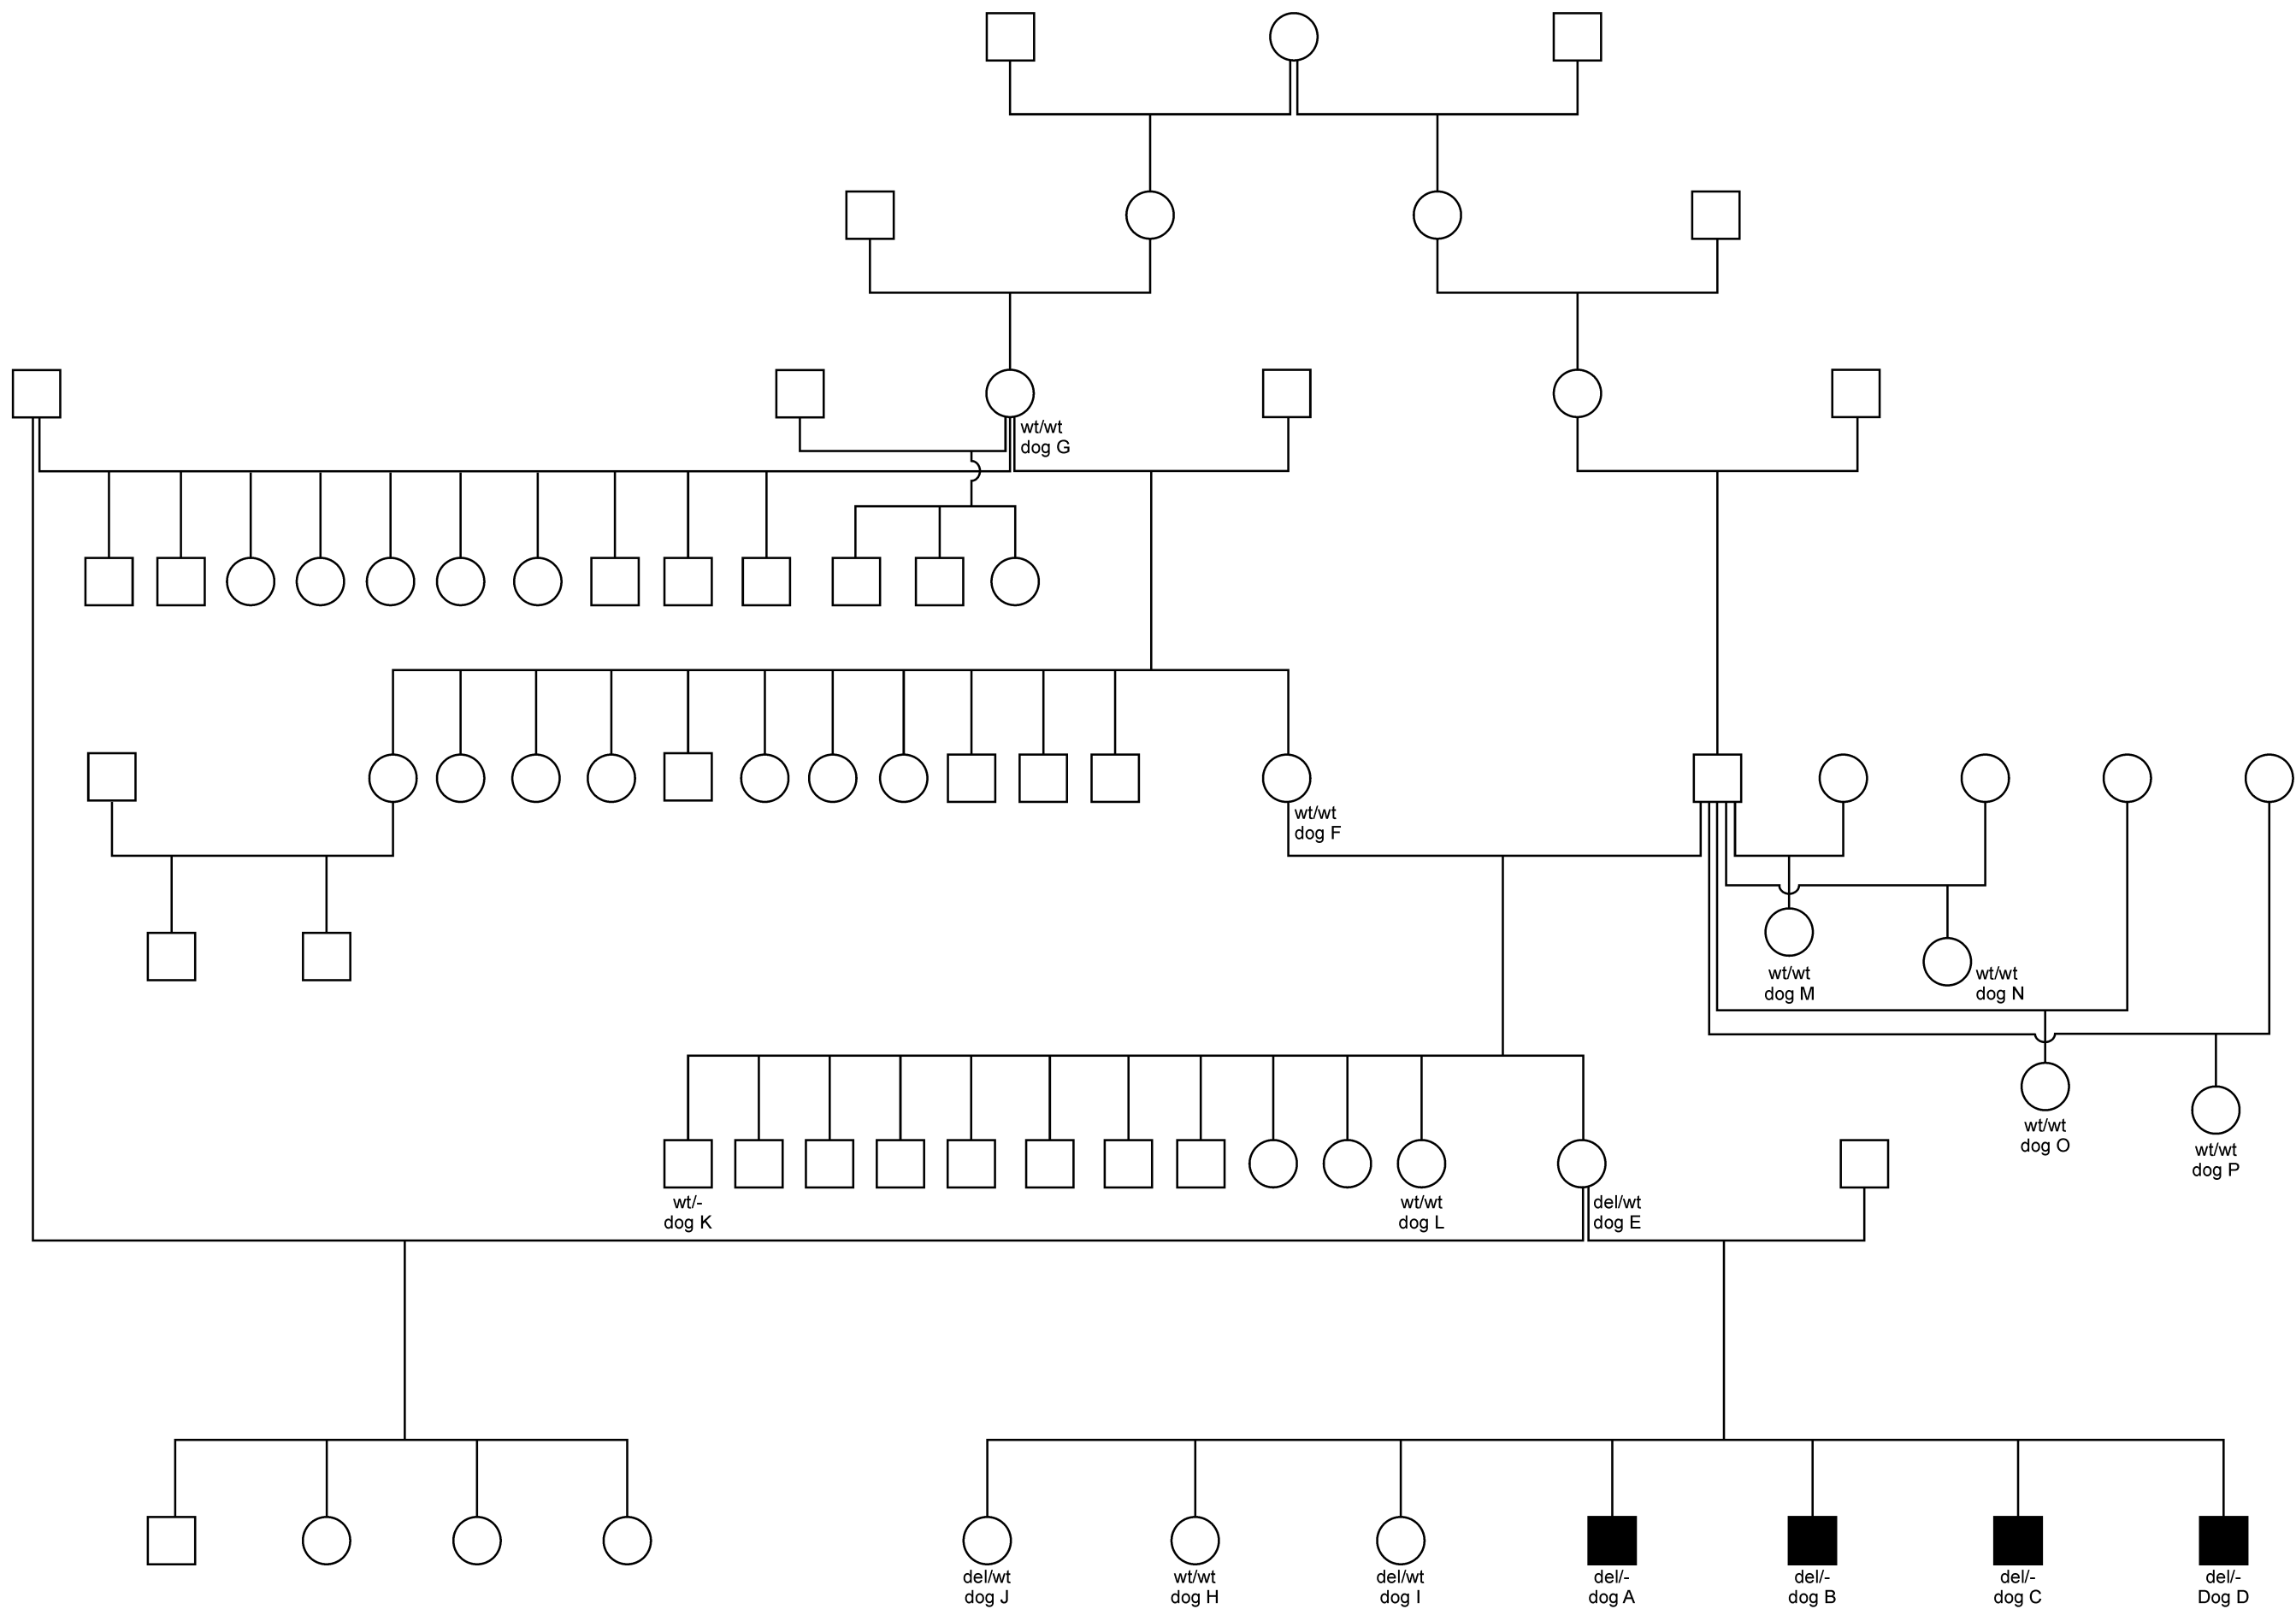



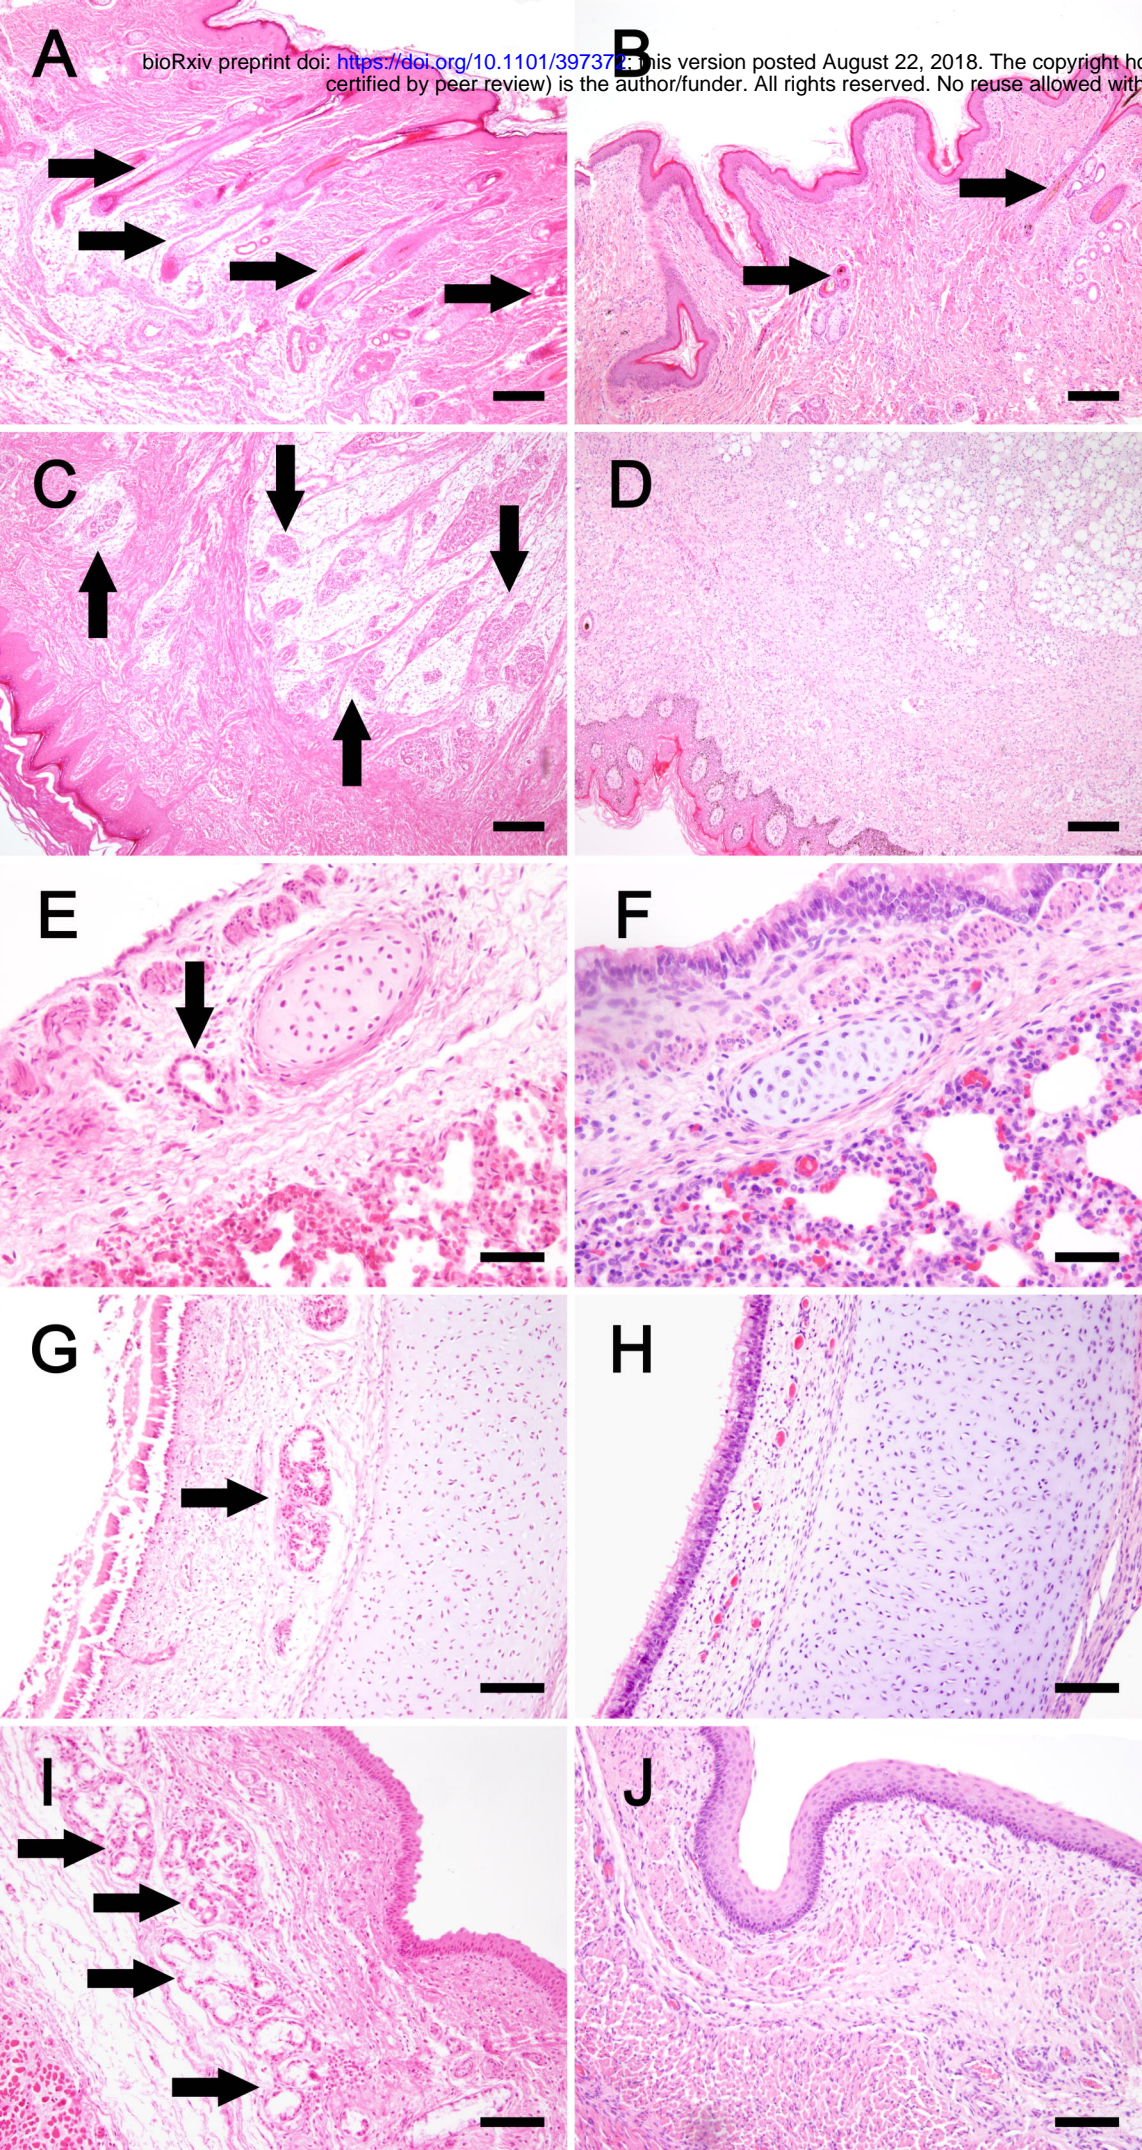



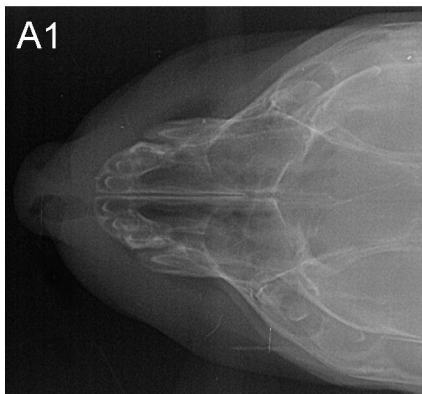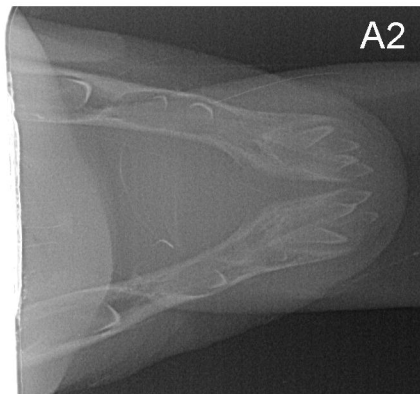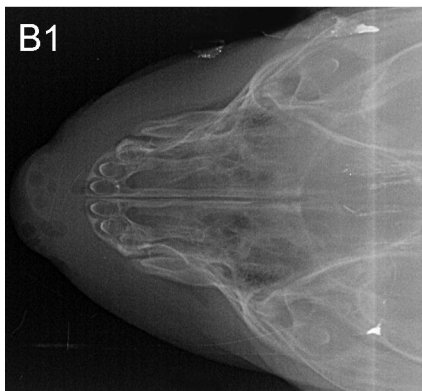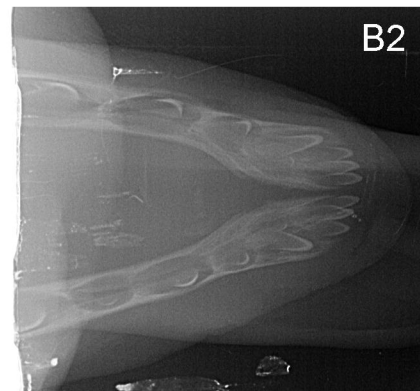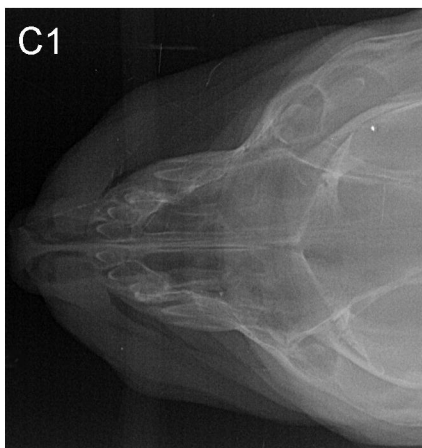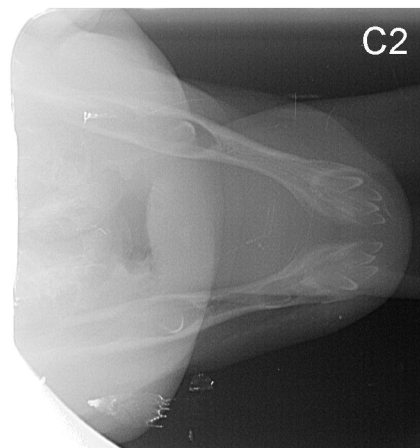

## female wildtype (dog F)

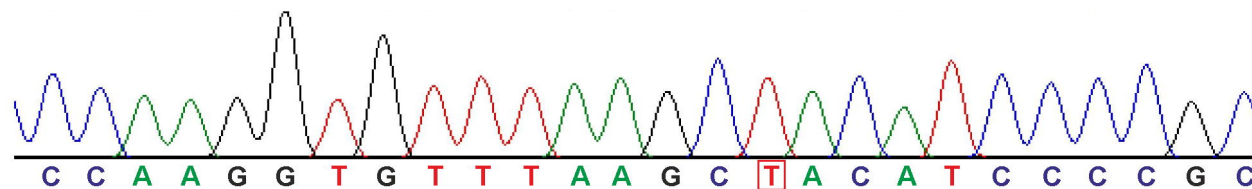

## heterozygous dam (dog E)

c.458delT

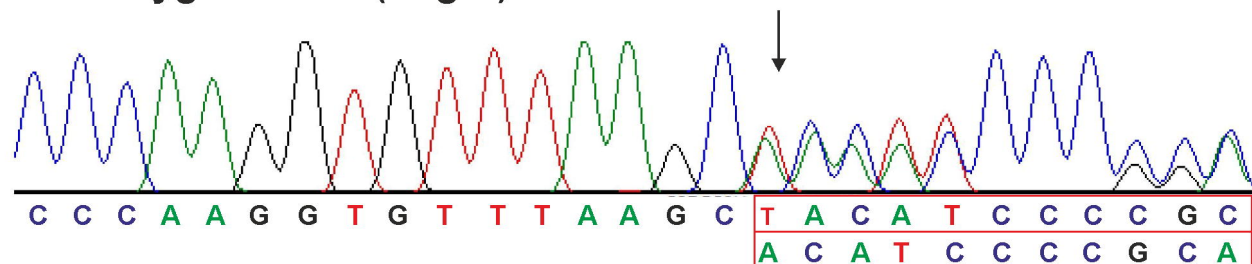

## hemizygous male puppy (dog A)

c.458delT

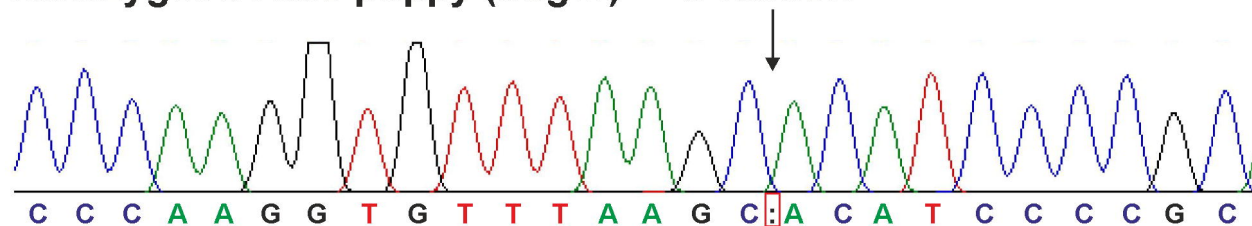



**A**

ENSEMBL\_EDA\_201\_WILDTYPE p.L153  
 113 258  
 ...NQPAVVHLQGQGSIAIQVKNDLSGGVLNDWSRITMNPVKFK L HPRSGEVLVDGTYFIYS...GEAPAS\*

ENSEMBL\_EDA\_202\_WILDTYPE p.L153  
 113 258  
 ...SQPAVVHLQGQGSIAIQVKNDLSGGVLNDWSRITMNPVKFK L HPRSGEVLVDGTYFIYS...GEAPAS\*

NCBI\_ECTODYSPLASIN-A\_WILDTYPE p.L281  
 241 386  
 ...NQPAVVHLQGQGSIAIQVKNDLSGGVLNDWSRITMNPVKFK L HPRSGEVLVDGTYFIYS...GEAPAS\*

NCBI\_ISOFORMX1\_WILDTYPE p.L281  
 241 385  
 ...NQPAVVHLQGQGSIAIQVKNDLSGGVLNDWSRITMNPVKFK L HPRSGEVLVDGTYFIYS...EPTSV\*

NCBI\_ISOFORMX2\_WILDTYPE p.L281  
 241 384  
 ...NQPAVVHLQGQGSIAIQVKNDLSGGVLNDWSRITMNPVKFK L HPRSGEVLVDGTYFIYS...GEAPAS\*

NCBI\_ISOFORMX3\_WILDTYPE p.L278  
 241 383  
 ...NQPAVVHLQGQGSIAIQVKN--GGVLNDWSRITMNPVKFK L HPRSGEVLVDGTYFIYS...GEAPAS\*

NCBI\_ISOFORMX4\_WILDTYPE p.L278  
 241 381  
 ...NQPAVVHLQGQGSIAIQVKN--GGVLNDWSRITMNPVKFK L HPRSGEVLVDGTYFIYS...GEAPAS\*

**B**

ENSEMBL\_EDA\_201\_MUTANT p.H153fsX173  
 113 173  
 ...NQPAVVHLQGQGSIAIQVKNDLSGGVLNDWSRITMNPVKFK H IPAAGSWRYWWTAPTSSIVR\*

ENSEMBL\_EDA\_202\_MUTANT p.H153fsX173  
 113 173  
 ...SQPAVVHLQGQGSIAIQVKNDLSGGVLNDWSRITMNPVKFK H IPAAGSWRYWWTAPTSSIVR\*

NCBI\_ECTODYSPLASIN-A\_MUTANT p.H281fsX301  
 241 301  
 ...NQPAVVHLQGQGSIAIQVKNDLSGGVLNDWSRITMNPVKFK H IPAAGSWRYWWTAPTSSIVR\*

NCBI\_ISOFORMX1\_MUTANT p.H281fsX301  
 241 301  
 ...NQPAVVHLQGQGSIAIQVKNDLSGGVLNDWSRITMNPVKFK H IPAAGSWRYWWTAPTSSIVR\*

NCBI\_ISOFORMX2\_MUTANT p.H281fsX354  
 241 354  
 ...NQPAVVHLQGQGSIAIQVKNDLSGGVLNDWSRITMNPVKFK H IPAAGSWRYWWTAPTSSIVRYTISTSLTPAMRWWWMRSPSCSVPAALRPAPPTTILVILQASASSKPGRRLR\*

NCBI\_ISOFORMX3\_MUTANT p.H278fsX298  
 241 298  
 ...NQPAVVHLQGQGSIAIQVKN--GGVLNDWSRITMNPVKFK H IPAAGSWRYWWTAPTSSIVR\*

NCBI\_ISOFORMX4\_MUTANT p.H278fsX351  
 241 351  
 ...NQPAVVHLQGQGSIAIQVKN--GGVLNDWSRITMNPVKFK H IPAAGSWRYWWTAPTSSIVRYTISTSLTPAMRWWWMRSPSCSVPAALRPAPPTTILVILQASASSKPGRRLR\*
